# Supplementary material
Source: PubMed Central journal article supplement (PMC7925702)
Supplement: NIHMS1621867-supplement-1.pdf [file NIHMS1621867-supplement-1.pdf]

**Table S1.** Peripheral disease symptoms in post-symptomatic AAV-treated SD cats and untreated controls

|                                               | Incidence of symptom (number of cats (percent)) and age of symptom onset (mean, s.d.) |                       |                         |                   |
|-----------------------------------------------|---------------------------------------------------------------------------------------|-----------------------|-------------------------|-------------------|
|                                               | EPS cohort<br>(n = 4)                                                                 | LPS cohort<br>(n = 3) | SD no tx<br>(n = 14)    | Normal<br>(n = 7) |
| Heart abnormality <sup>A</sup>                | 3/4 (75)<br>11 ± 6.5                                                                  | -                     | 2/14 (14)<br>3.1 ± 1.5  | -                 |
| GI dysfunction <sup>B</sup>                   | 4/4 (100)<br>12 ± 5.6                                                                 | -                     | 1/14 (7.1)<br>1.8       | -                 |
| Bladder dysfunction <sup>C</sup>              | 2/4 (50)<br>13 ± 2.0                                                                  | -                     | -                       | -                 |
| Oral mass                                     | 1/4 (25)<br>6.0                                                                       | -                     | -                       | -                 |
| Recurrent diarrhea <sup>D</sup>               | -                                                                                     | 1/3 (33)<br>3.0       | -                       | -                 |
| Respiratory infection <sup>D</sup>            | 2/4 (50)<br>9.4 ± 9.8                                                                 | -                     | 1/14 (7.1)<br>1.8       | -                 |
| Recurrent ocular/nasal discharge <sup>D</sup> | 1/4 (25)<br>2.5                                                                       | -                     | 6/14 (43)<br>1.3 ± 0.67 | -                 |

<sup>A</sup> Symptoms include heart enlargement diagnosed from radiographs or postmortem analysis; heart murmur upon auscultation; or abnormality associated with papillary muscle in the left ventricle.

<sup>B</sup> Refers to distended small intestines, distended abdomen, or esophageal dysmotility.

<sup>C</sup> Refers to distended bladder upon palpation.

<sup>D</sup> Common conditions that also occur in normal controls so may be unrelated to SD or treatment

Abbreviations: LPS = late post-symptomatic; EPS = early postsymptomatic; GI = gastrointestinal; tx = treatment

**Table S2.** Vector copy number in brain, spinal cord, skeletal muscle, liver, and heart of post-symptomatic AAV-treated SD cats

| Region          | Block | Vector copy number per $\mu\text{g}$ genomic DNA (mean, s.d.) |                                   |
|-----------------|-------|---------------------------------------------------------------|-----------------------------------|
|                 |       | Post-symptomatic cohort                                       |                                   |
|                 |       | Early                                                         | Late                              |
| Cerebrum        | A     | <b>19,000</b> (16,000)                                        | <b>20,000</b> (6,000)             |
|                 | B     | <b>5,300</b> (3,000)                                          | <b>6,400</b> (330)                |
|                 | C     | <b>12,000</b> (11,000)                                        | <b>6,900</b> (2,300)              |
|                 | D     | <b>30,000</b> (22,000)                                        | <b>13,000</b> (11,000)            |
|                 | E     | <b>12,000</b> (5,000)                                         | <b>18,000</b> (16,000)            |
| Cerebellum      | F     | <b>38,000</b> (44,000)                                        | <b>6,100</b> (5,800)              |
|                 | G     | <b>57,000</b> (73,000)                                        | <b>4,100</b> (2,800)              |
|                 | H     | <b>32,000</b> (44,000)                                        | <b>9,000</b> (6,200)              |
| Spinal cord     | I     | <b>3,200</b> (2,400)                                          | <b>1,700</b> (810)                |
|                 | J     | <b>4,500</b> (2,800)                                          | <b>2,900</b> (850)                |
|                 | K     | <b>2,100</b> (150)                                            | <b>1,900</b> (760)                |
|                 | L     | <b>5,000</b> (3,200)                                          | <b>2,400</b> (5,600)              |
|                 | M     | <b>5,000</b> (900)                                            | <b>1,900</b> (1,400) <sup>▼</sup> |
|                 | N     | <b>5,800</b> (2,300)                                          | <b>2,000</b> (680) <sup>▼</sup>   |
|                 | O     | <b>4,400</b> (1,100)                                          | <b>1,600</b> (1,100) <sup>▼</sup> |
| Sciatic nerve   | -     | <b>0</b> (0)                                                  | <b>2,200</b> (3,400)              |
| Liver           | -     | <b>20,000</b> (20,000)                                        | <b>37,000</b> (26,000)            |
| Skeletal muscle | -     | <b>0</b> (0)                                                  | <b>2,200</b> (3,900)              |
| Heart           | -     | <b>1,800</b> (2,800)                                          | <b>180</b> (260)                  |

<sup>▼</sup>, significantly lower than the early post-symptomatic cohort,  $P = 0.026$ .

Block lettering corresponds to **Figure 4a**.

Abbreviations: CNS = central nervous system

Samples were analyzed in triplicate and the average value is reported
